# Supplementary material
Source: Springer Nature journal article supplement (https://www.springermedizin.de/resource/supplementary/13017_2014_368_MOESM2_ESM.pdf/9636048)

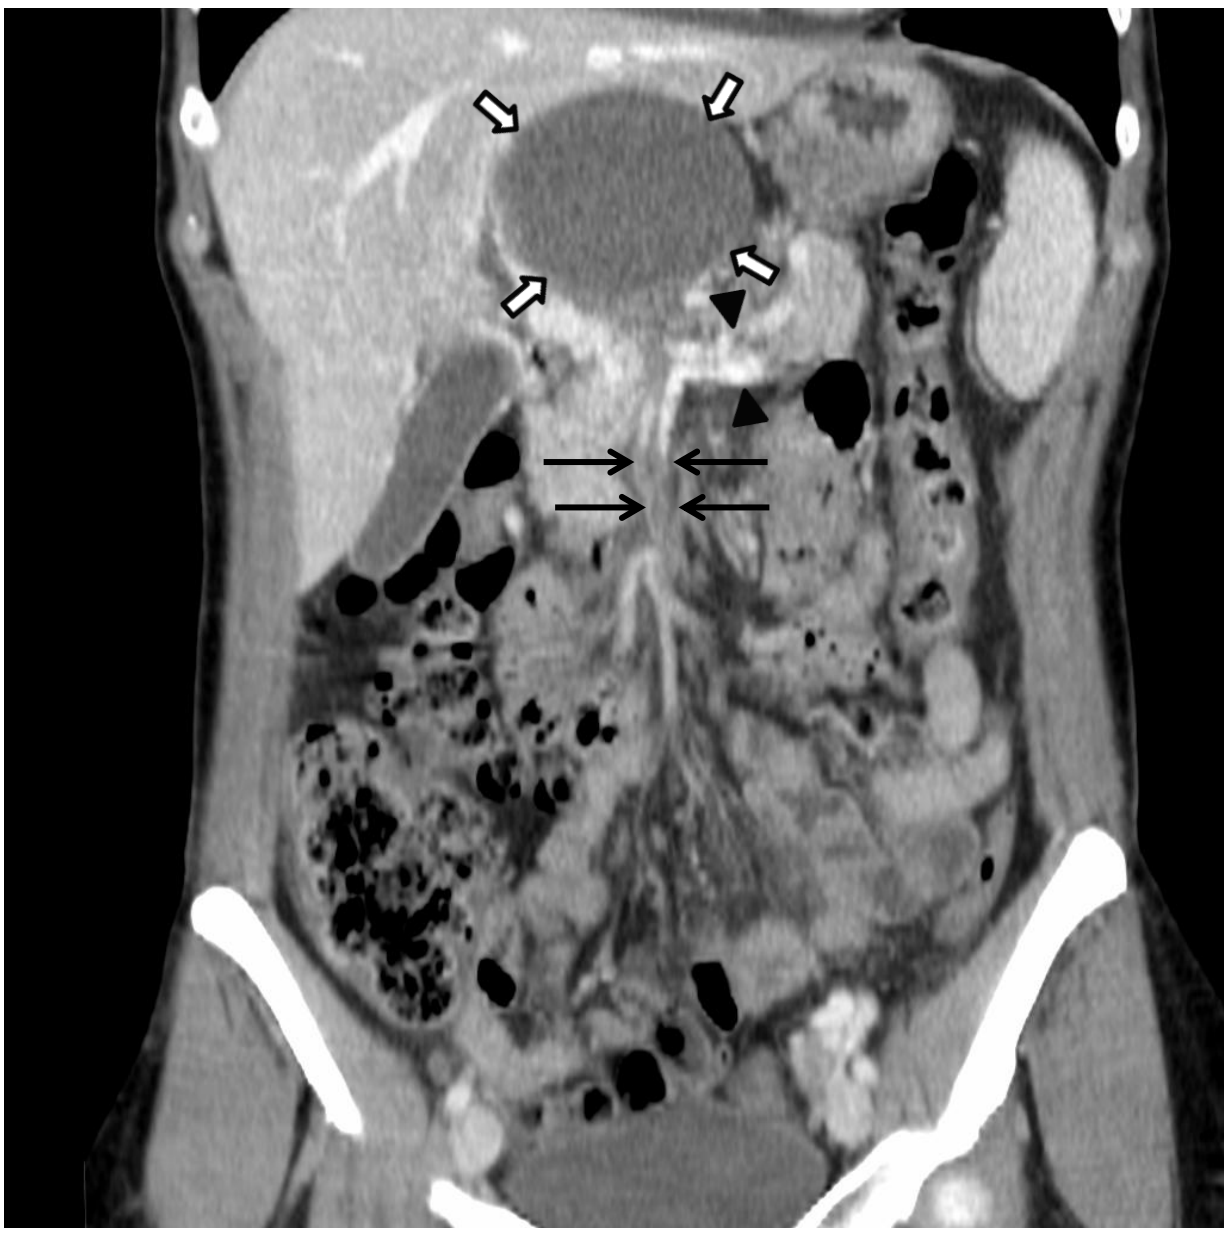

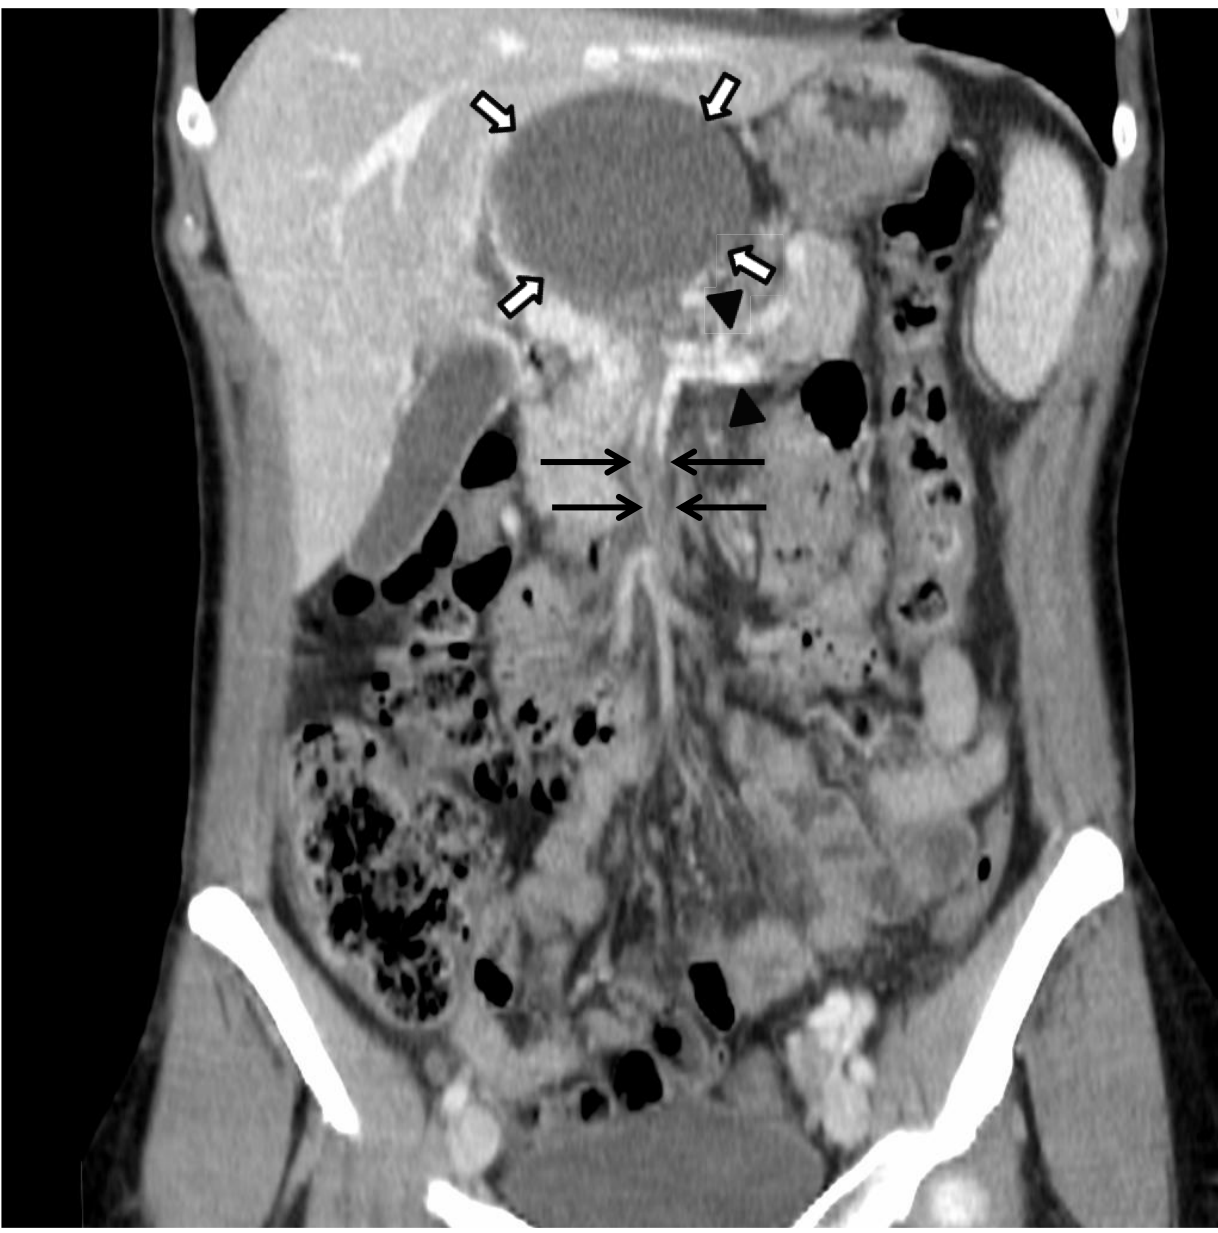

Supplement: MOESM2 [file 9636048]
